# Supplementary material for: Electrospin-Coating of Paper: A Natural Extracellular Matrix Inspired Design of Scaffold
Source: MDPI journal article supplement (doi:10.3390/polym11040650), 2019-04-09
Supplement: s1 [file s1]

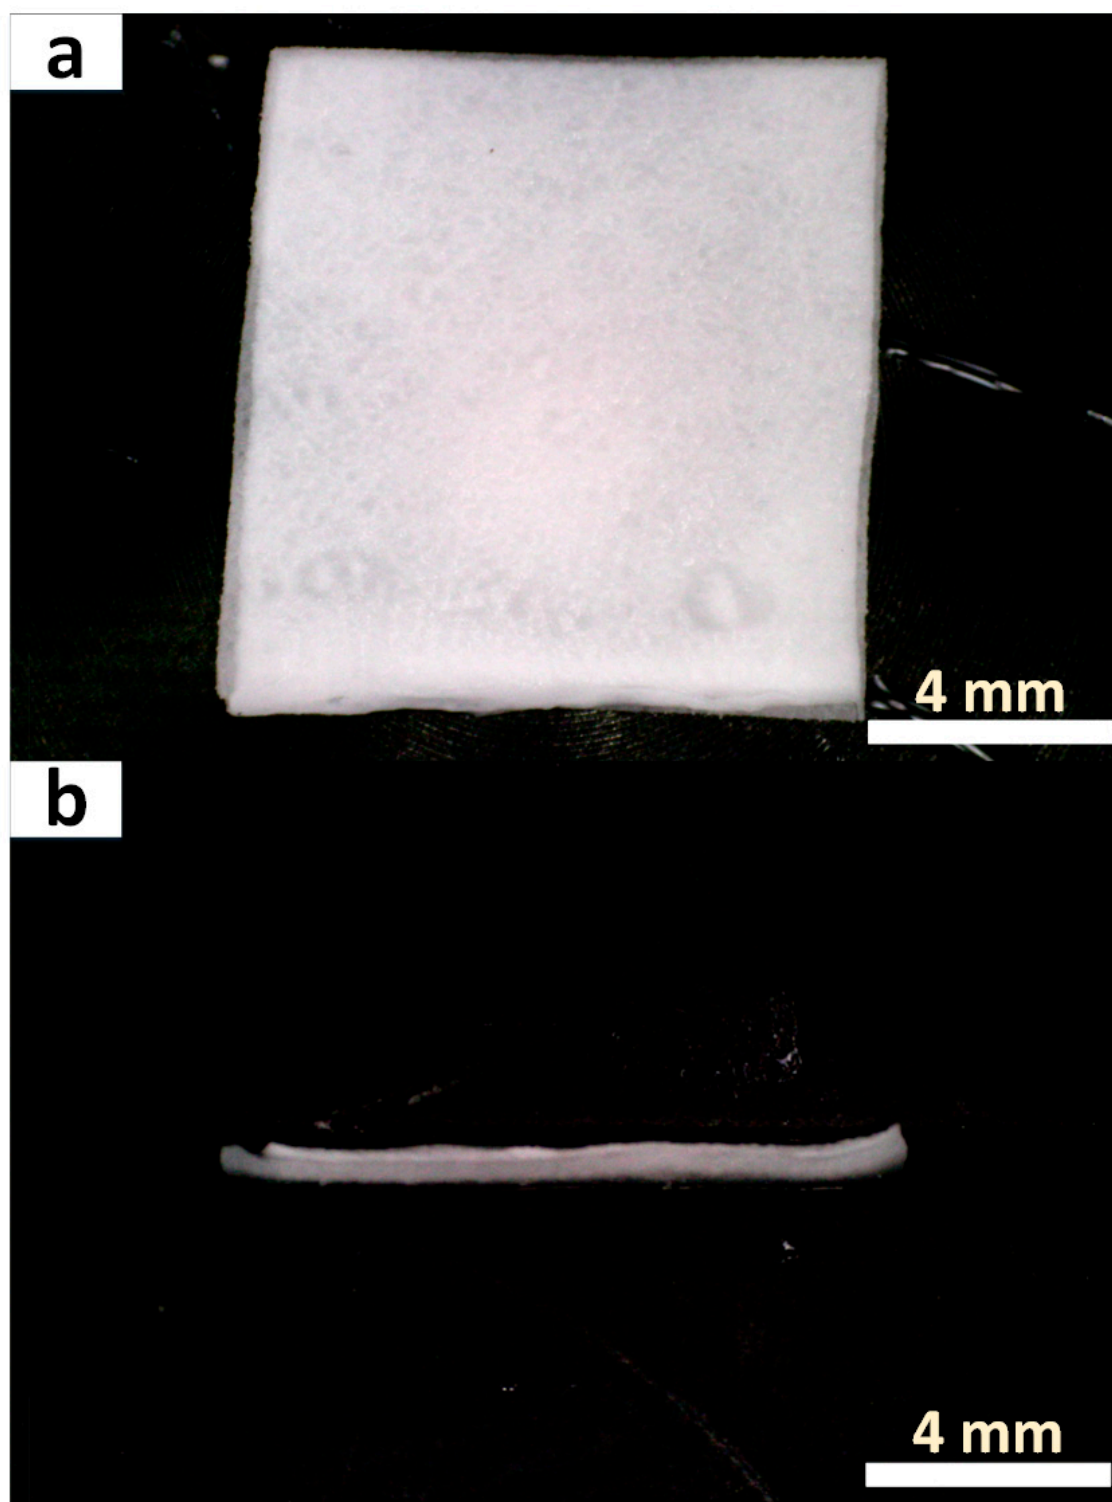

**Figure S1. Optical Microscopy of ES-PCL/FP after 14 days of immersion in culturing medium. (a) Top view, (b) Side view**

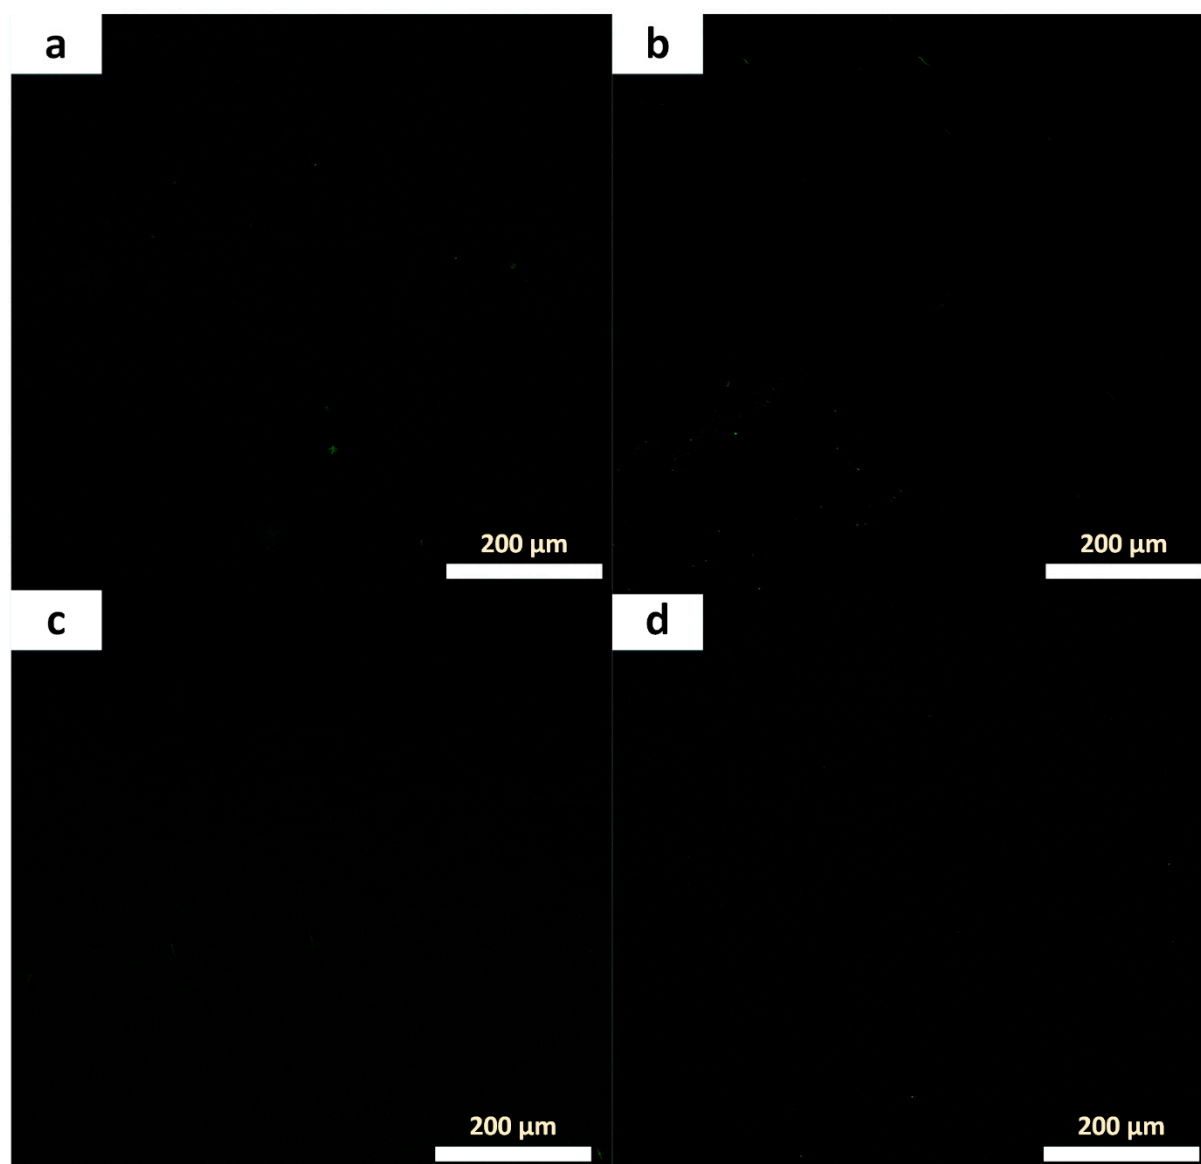

**Figure S2.** Live/dead confocal of blank scaffolds. (a) ES-PCL, (b) ES-PCL/FP, (c) FP, (d) DFP
